# Supplementary material for: EARN: An Ensemble Machine Learning Algorithm to Predict Driver Genes in Metastatic Breast Cancer
Source: Research Square preprint supplement (doi:10.21203/rs.3.rs-130680/v1), 2020-12-29
Supplement: Supplementary file 6 [file c22278ef23900093a2381559.xls]

## Sheet: Sheet1
Table 5 Validation of four learning methods by some evaluation metrics. (a) MBCA, (b) BRCA
	Method name	F1 score	False Positive Rate	Maximum Precision	Average-Precision	recall	ROC-AUC*
(a)	EARN	0.7961	0	1	0.8266	0.6701	0.9924
MBCA	RF	0.756	0.0008	0.9069	0.7873	0.6603	0.9418
	ANN	0.799	0	1	0.8074	0.6733	0.968
	NLSVM	0.3972	0.0154	0.3092	0.5852	0.5885	0.977
(b)	EARN	0.9313	0	1	0.9585	0.8749	0.9979
BRCA	RF	0.8864	0.0019	0.9061	0.9171	0.8774	0.9719
	ANN	0.8996	0	1	0.9417	0.8225	0.9873
	NLSVM	0.5441	0.0279	0.446	0.859	0.8422	0.9926
* Receiver Operating Characteristic-Area under Curve
