# Supplementary material for: EARN: An Ensemble Machine Learning Algorithm to Predict Driver Genes in Metastatic Breast Cancer
Source: Research Square preprint supplement (doi:10.21203/rs.3.rs-130680/v1), 2020-12-29
Supplement: Supplementary file 7 [file d0fe3e7001c0bea03712765f.xls]

## Sheet: Table S42
EARN: an ensemble machine learning algorithm to predict driver genes in metastatic breast cancer
Leila Mirsadeghi1, Reza Haji Hosseini1*, Ali Mohammad Banaei-Moghaddam2, Kaveh Kavousi3*
* Correspondence: kkavousi@ut.ac.ir; hosseini@pnu.ac.ir;
1Department of Biology, Faculty of Science, Payame Noor University, Tehran, Iran
2 Laboratory of Genomics and Epigenomics (LGE), Department of Biochemistry, Institute of Biochemistry and Biophysics (IBB), University of Tehran, Tehran, Iran
3 Laboratory of Complex Biological Systems and Bioinformatics (CBB), Department of Bioinformatics, Institute of Biochemistry and Biophysics (IBB), University of Tehran, Tehran, Iran
Additional file 9: Table S42 The list of predicted genes by EARN related to MBCA that are enriched in the HCMDB
Recalled genes by EC related MBCA in the HCMDB	Rank number	The number of studies that has cited these genes
KDR	17	2
SELE	49	1
MME	50	1
KLF4	78	2
STAT1	95	1
PTPN3	105	1
FOXM1	115	1
MAPK1	177	1
HIF1A	181	6
PIK3CG	200	1
STAT5B	203	1
TGM2	208	2
ILK	213	1
DOCK1	226	2
SRC	227	4
ITGB4	239	2
PGR	255	2
TRIP10	264	1
ITGA6	322	3
IL19	334	1
ITGB1	339	2
TSC2	410	1
ITGAV	446	4
OGT	448	1
BMP4	450	1
OGG1	526	1
PAK4	534	1
STAT5A	578	1
ATF3	583	1
KRT5	609	2
BCAR1	642	1
TOP2A	689	1
DLEC1	703	1
ROBO1	742	1
RADIL	816	1
INPPL1	852	1
CCDC88A	863	3
PTAFR	864	1
MMP14	867	4
XRCC5	896	1
MKI67	943	4
AQP5	968	1
ABCG2	1032	2
F2R	1079	1
MMP8	1131	1
EYA2	1201	1
CCR7	1275	1
IL1RL1	1276	1
ABCC5	1378	1
ACTN4	1389	1
CSNK1A1	1451	1
HPSE	1472	1
HTT	1579	2
PITPNM1	1585	1
FERMT1	1591	1
NET1	1670	1
TNN	1704	1
TYK2	1723	1
MAP3K11	1738	1
NRP2	1804	1
PER1	1847	1
FLT4	1889	1
UTRN	1983	1
IRS2	2006	1
EFEMP1	2081	1
DLC1	2082	2
ALCAM	2084	2
CD276	2118	1
CYLD	2168	1
ACE	2189	1
LOX	2214	3
ADORA2B	2229	1
SETD1A	2267	1

## Sheet: Table S43
EARN: an ensemble machine learning algorithm to predict driver genes in metastatic breast cancer
Leila Mirsadeghi1, Reza Haji Hosseini1*, Ali Mohammad Banaei-Moghaddam2, Kaveh Kavousi3*
* Correspondence: kkavousi@ut.ac.ir; hosseini@pnu.ac.ir;
1Department of Biology, Faculty of Science, Payame Noor University, Tehran, Iran
2 Laboratory of Genomics and Epigenomics (LGE), Department of Biochemistry, Institute of Biochemistry and Biophysics (IBB), University of Tehran, Tehran, Iran
3 Laboratory of Complex Biological Systems and Bioinformatics (CBB), Department of Bioinformatics, Institute of Biochemistry and Biophysics (IBB), University of Tehran, Tehran, Iran
Additional file 9: Table S43 38 novel (new) genes have been predicted by EARN50 related to MBCA. Also, rank numbers, scores, and rate of counted mutation for these genes according to the original mutation file are available in this list. In this list, 13 marked genes with an asterisk have also been introduced concerning different primary cancers in the OMIM, CGC, and NCG databases
Symbol	Prediction score	Rank number	PSMM (Study 2017)	PSMM (Study 2016)	NSCGMC	NSCGMB	MCMG	PKGECE	PKGEBE
OXCT1	0.907092	1	0.017	0.005	#N/A	#N/A	9	#N/A	#N/A
GCNT4	0.906318	2	0.017	#N/A	#N/A	#N/A	4	#N/A	#N/A
BATF	0.903848	3	0.013	0.005	#N/A	#N/A	4	#N/A	#N/A
UNC13D	0.903565	4	0.034	0.014	#N/A	#N/A	13	#N/A	#N/A
C8orf44	0.899336	6	0.021	#N/A	#N/A	#N/A	5	#N/A	#N/A
NCOR1*	0.899309	7	0.038	0.019	#N/A	#N/A	17	✓	✓
FOXA1*	0.899131	8	0.03	0.033	#N/A	#N/A	20	✓	✓
MAPK8IP1*	0.897475	9	0.034	0.005	#N/A	#N/A	14	✓	#N/A
LZTR1*	0.89631	10	0.03	0.014	#N/A	#N/A	12	✓	#N/A
CBFB*	0.894354	12	0.025	0.028	#N/A	#N/A	15	✓	✓
GCM2	0.893524	15	0.017	#N/A	#N/A	#N/A	5	#N/A	#N/A
MAP1A	0.890568	16	0.034	0.019	#N/A	#N/A	13	#N/A	#N/A
THAP3	0.889383	18	0.021	#N/A	#N/A	#N/A	5	#N/A	#N/A
XBP1*	0.886668	20	0.025	#N/A	#N/A	#N/A	10	✓	✓
PAX9	0.884776	21	0.025	#N/A	#N/A	#N/A	8	#N/A	#N/A
MTO1	0.881866	22	0.051	#N/A	#N/A	#N/A	13	#N/A	#N/A
SIN3A	0.878991	23	0.013	0.019	#N/A	#N/A	9	✓	#N/A
TMEM119	0.877136	24	0.021	0.005	#N/A	#N/A	6	#N/A	#N/A
CACNA1E*	0.874105	25	0.021	0.056	#N/A	#N/A	25	✓	#N/A
C12orf29	0.8729	26	0.013	#N/A	#N/A	#N/A	3	#N/A	#N/A
RUNX1*	0.870851	28	0.017	#N/A	#N/A	#N/A	5	✓	✓
ZNF546	0.870709	29	0.021	0.014	#N/A	#N/A	8	#N/A	#N/A
ARHGEF11	0.860873	32	0.021	0.009	#N/A	#N/A	12	#N/A	#N/A
PCDHGB2	0.860099	33	0.021	0.009	#N/A	#N/A	8	#N/A	#N/A
FUZ	0.858761	34	0.017	#N/A	#N/A	#N/A	5	#N/A	#N/A
GPS2*	0.858332	35	0.021	0.009	#N/A	#N/A	8	✓	✓
PLXNB2*	0.858069	36	0.025	0.024	#N/A	#N/A	14	✓	#N/A
TMLHE	0.855829	37	0.008	0.019	#N/A	#N/A	7	#N/A	#N/A
FLYWCH2	0.855551	38	0.013	#N/A	#N/A	#N/A	3	#N/A	#N/A
RLIM	0.85537	39	0.013	0.019	#N/A	#N/A	7	#N/A	#N/A
SLC25A32	0.854831	40	0.008	0.014	#N/A	#N/A	5	#N/A	#N/A
COL4A3	0.853658	41	0.013	0.005	#N/A	#N/A	4	#N/A	#N/A
CDYL*	0.851378	43	0.034	0.009	#N/A	#N/A	10	✓	#N/A
CYTL1	0.850225	44	0.013	0.005	#N/A	#N/A	4	#N/A	#N/A
PIAS3	0.849524	45	0.021	#N/A	#N/A	#N/A	6	#N/A	#N/A
KIF1A*	0.848368	46	0.025	0.019	#N/A	#N/A	12	✓	#N/A
SLC24A1	0.84805	47	0.025	0.005	#N/A	#N/A	10	#N/A	#N/A
STAG1*	0.847926	48	0.008	0.042	#N/A	#N/A	12	✓	#N/A
* The confirmed genes concerning different primary cancers in the OMIM, CGC, and NCG databases
PSMM: Percentage of samples with one or more mutations based on initial mutation file
NSCGMC: The number of studies that has cited genes for different metastatic cancers in the HCMDB
NSCGMB: The number of studies that has cited genes for MBCA in HCMDB
MCMG: Mutation counts for mutated genes across 453 metastasis tumor samples based on initial mutation file
PKGECE: Predicted known genes by EC for cancers that are enriched in OMIM, CGC, and NCG
PKGEBE: Predicted known genes by EC for BRCA that are enriched in OMIM, CGC, and NCG
