# Supplementary material for: EARN: An Ensemble Machine Learning Algorithm to Predict Driver Genes in Metastatic Breast Cancer
Source: Research Square preprint supplement (doi:10.21203/rs.3.rs-130680/v1), 2020-12-29
Supplement: Supplementary file 9 [file f3c4868e23e4e6c8a2a512e3.xls]

## Sheet: Table S44
EARN: an ensemble machine learning algorithm to predict driver genes in metastatic breast cancer
Leila Mirsadeghi1, Reza Haji Hosseini1*, Ali Mohammad Banaei-Moghaddam2, Kaveh Kavousi3*
* Correspondence: kkavousi@ut.ac.ir; hosseini@pnu.ac.ir;
1Department of Biology, Faculty of Science, Payame Noor University, Tehran, Iran
2 Laboratory of Genomics and Epigenomics (LGE), Department of Biochemistry, Institute of Biochemistry and Biophysics (IBB), University of Tehran, Tehran, Iran
3 Laboratory of Complex Biological Systems and Bioinformatics (CBB), Department of Bioinformatics, Institute of Biochemistry and Biophysics (IBB), University of Tehran, Tehran, Iran
Additional file 10: Table S44 The common (1-14) and specific enriched pathways (15-91) for BRCA and MBCA using ReactomeFIVIz (FDR < 0.03). Also, this table shows the number and names of the top 100 genes in a given enriched pathway for both of BRCA and MBCA
Number	Pathways	Genes for BRCA	Number of genes in each pathway for BRCA	Genes for MBCA	Number of genes in each pathway for MBCA
1	RUNX1 regulates estrogen receptor mediated transcription	RUNX1,CBFB,SMARCA4	3	RUNX1,CBFB	2
2	RUNX2 regulates bone development	RUNX1,CBFB	2	AR,CBFB,HDAC3	3
3	RUNX1 regulates transcription of genes involved in differentiation of keratinocytes	RUNX1,CBFB	2	RUNX1,CBFB	2
4	RUNX1 interacts with co-factors whose precise effect on RUNX1 targets is not known	RUNX1,CBFB	2	RUNX1,CBFB	2
5	Generic Transcription Pathway	RUNX1,CBFB	2	RUNX1,AR,TBL1XR1,CBFB,BDNF,YWHAE,SIN3A,PRMT1,NCOR1,HDAC3,GPS2,STAT1,KLF4,KRAS	14
6	RUNX3 regulates p14-ARF	RUNX1,CBFB	2	RUNX1,CBFB,KRAS	3
7	Signaling by Receptor Tyrosine Kinases	RUNX1,CBFB	2	KDR,PRKCD,COL4A3,PIK3R1,PDGFD,BDNF,PTPRJ,NCOR1,NOS3,STAT1,KRAS	11
8	RUNX2 regulates genes involved in differentiation of myeloid cells	NBN,RUNX1,CBFB,NOTCH4,ABL1,SMAD2,SMAD4,SMURF1,SMARCA4,NR4A1,PTEN,MED23,TFDP1,PPARG,PTPN11	15	RUNX1,CBFB	2
9	RUNX1 regulates expression of components of tight junctions	RUNX1,CBFB	2	RUNX1,CBFB	2
10	RUNX1 regulates transcription of genes involved in interleukin signaling	RUNX1,CBFB	2	RUNX1,CBFB	2
11	RUNX1 regulates transcription of genes involved in BCR signaling	GRB7,PRKCZ,FLT1,ITGB3,ITGAV,GAB1,GAB2,ERBB3,EGF,PTPN11	10	RUNX1,CBFB	2
12	RUNX1 regulates transcription of genes involved in WNT signaling	CBFB,ABL1,SMAD4	3	RUNX1,CBFB	2
13	RUNX1 regulates transcription of genes involved in differentiation of myeloid cells	RUNX1,CBFB	2	RUNX1,CBFB	2
14	Transcriptional regulation by RUNX2	RUNX1,CBFB,ABL1,SMAD4,SMURF1	5	RUNX1,AR,CBFB,HDAC3,STAT1	5
15	Signaling by TGF-beta Receptor Complex	PARD3,PRKCZ,SMAD2,SMAD4,SMURF1,TGFBR2,TFDP1	7	None	0
16	PECAM1 interactions	ITGB3,ITGAV,PTPN11	3	None	0
17	Interleukin-15 signaling	JAK1,GAB2,IL2RB	3	None	0
18	RET signaling	GRB7,GAB1,GAB2,PTPN11	4	None	0
19	PI3K events in ERBB2 signaling	GAB1,ERBB3,EGF	3	None	0
20	Signaling by ERBB2	GRB7,GAB1,ERBB3,EGF	4	None	0
21	Signaling by NODAL	SMAD2,SMAD4,ACVR1B	3	None	0
22	Reelin signalling pathway	VLDLR,RELN	2	None	0
23	Negative regulation of the PI3K/AKT network	PTEN,GAB1,ERBB3,EGF,PTPN11	5	None	0
24	Integrin cell surface interactions	ICAM1,FN1,ITGAM,ITGB5,ITGB3,ITGAV,ITGA4	7	None	0
25	Signaling by TGF-beta family members	PARD3,PRKCZ,SMAD2,SMAD4,SMURF1,TGFBR2,TFDP1,ACVR1B	8	None	0
26	TGF-beta receptor signaling in EMT (epithelial to mesenchymal transition)	PARD3,PRKCZ,SMURF1,TGFBR2	4	None	0
27	Signaling by Interleukins	IL1RN,ICAM1,POU2F1,FN1,MSN,SMARCA4,ITGAM,JAK1,SYK,GAB2,IL1RAPL1,PTPN11,IL2RB	13	None	0
28	RNA Polymerase II Transcription	NBN,RUNX1,CBFB,NOTCH4,ABL1,SMAD2,SMAD4,POU2F1,CPSF1,SMURF1,CPSF3,SMARCA4,NR4A1,PTEN,PCF11,MED23,TFDP1,PPARG,PTPN11	19	None	0
29	Interleukin-2 signaling	JAK1,SYK,IL2RB	3	None	0
30	GPVI-mediated activation cascade	PRKCZ,PIK3CG,SYK,PTPN11	4	None	0
31	TGF-beta receptor signaling activates SMADs	SMAD2,SMAD4,SMURF1,TGFBR2	4	None	0
32	Signaling by Activin	SMAD2,SMAD4,ACVR1B	3	None	0
33	Regulation of RUNX1 Expression and Activity	RUNX1,CBFB,PTPN11	3	None	0
34	Interleukin-3, Interleukin-5 and GM-CSF signaling	JAK1,GAB2,PTPN11,IL2RB	4	None	0
35	Interleukin-2 family signaling	JAK1,SYK,GAB2,IL2RB	4	None	0
36	GAB1 signalosome	GAB1,EGF,PTPN11	3	None	0
37	Platelet activation, signaling and aggregation	PRKCZ,FN1,SERPINA1,ITGB3,PIK3CG,SYK,EGF,PTPN11	8	None	0
38	Syndecan interactions	ITGB5,ITGB3,ITGAV	3	None	0
39	Processing of Intronless Pre-mRNAs	CPSF1,CPSF3,PCF11	3	None	0
40	ECM proteoglycans	ITGB5,ITGB3,ITGAV,DCN	4	None	0
41	GRB7 events in ERBB2 signaling	GRB7,ERBB3	2	None	0
42	MET activates PTPN11	GAB1,PTPN11	2	None	0
43	Interleukin receptor SHC signaling	JAK1,GAB2,IL2RB	3	None	0
44	Downregulation of TGF-beta receptor signaling	SMAD2,SMURF1,TGFBR2	3	None	0
45	Integrin alphaIIb beta3 signaling	FN1,ITGB3,SYK	3	None	0
46	Integrin signaling	FN1,ITGB3,SYK	3	None	0
47	Processing of Capped Intronless Pre-mRNA	CPSF1,CPSF3,PCF11	3	None	0
48	Molecules associated with elastic fibres	ITGB5,ITGB3,ITGAV	3	None	0
49	Cell surface interactions at the vascular wall	GRB7,FN1,ITGAM,ITGB3,ITGAV,ITGA4,PTPN11	7	None	0
50	Cross-presentation of particulate exogenous antigens (phagosomes)	ITGB5,ITGAV	2	None	0
51	MAPK1 (ERK2) activation	JAK1,PTPN11	2	None	0
52	Interleukin-4 and Interleukin-13 signaling	ICAM1,POU2F1,FN1,ITGAM,JAK1	5	None	0
53	SMAD2/SMAD3:SMAD4 heterotrimer regulates transcription	SMAD2,SMAD4,TFDP1	3	None	0
54	MAPK3 (ERK1) activation	JAK1,PTPN11	2	None	0
55	Cytokine Signaling in Immune system	IL1RN,ICAM1,POU2F1,FN1,MSN,SMARCA4,ITGAM,JAK1,SYK,GAB2,IL1RAPL1,PTPN11,IL2RB	13	None	0
56	PIP3 activates AKT signaling	NR4A1,PTEN,GAB1,PPARG,ERBB3,EGF,PTPN11	7	None	0
57	RUNX1 and FOXP3 control the development of regulatory T lymphocytes (Tregs)	RUNX1,CBFB	2	None	0
58	Interleukin-6 signaling	JAK1,PTPN11	2	None	0
59	Pre-NOTCH Transcription and Translation	RUNX1,NOTCH4,TFDP1	3	None	0
60	Elastic fibre formation	ITGB5,ITGB3,ITGAV	3	None	0
61	mRNA Splicing - Major Pathway	CPSF1,CPSF3,PCF11,PRPF40A,SF3B1,SF3A1	6	None	0
62	Platelet Aggregation (Plug Formation)	FN1,ITGB3,SYK	3	None	0
63	Non-integrin membrane-ECM interactions	ITGB5,ITGB3,ITGAV	3	None	0
64	Regulation of MECP2 expression and activity	None	0	TBL1XR1,SIN3A,NCOR1,HDAC3,GPS2	5
65	Transcriptional Regulation by MECP2	None	0	TBL1XR1,BDNF,SIN3A,NCOR1,HDAC3,GPS2	6
66	Signaling by PDGF	None	0	COL4A3,PIK3R1,PDGFD,STAT1,KRAS	5
67	HDACs deacetylate histones	None	0	TBL1XR1,NCOR1,HDAC3,GPS2	4
68	ESR-mediated signaling	None	0	FOXA1,KPNA2,RUNX1,CBFB,STAG1,PRMT1	6
69	NR1D1 (REV-ERBA) represses gene expression	None	0	NCOR1,HDAC3	2
70	RUNX1 regulates genes involved in megakaryocyte differentiation and platelet function	None	0	RUNX1,CBFB,SIN3A,PRMT1	4
71	VEGFR2 mediated cell proliferation	None	0	KDR,PRKCD,KRAS	3
72	VEGFA-VEGFR2 Pathway	None	0	KDR,PRKCD,PIK3R1,NOS3,KRAS	5
73	Transcriptional activation of mitochondrial biogenesis	None	0	TBL1XR1,SIRT4,NCOR1,HDAC3	4
74	PLC beta mediated events	None	0	KPNA2,PRKCG,PRKCD,PLCB1	4
75	Signaling by Nuclear Receptors	None	0	FOXA1,KPNA2,RUNX1,CBFB,STAG1,PRMT1	6
76	G-protein mediated events	None	0	KPNA2,PRKCG,PRKCD,PLCB1	4
77	RUNX2 regulates osteoblast differentiation	None	0	AR,CBFB,HDAC3	3
78	Signaling by VEGF	None	0	KDR,PRKCD,PIK3R1,NOS3,KRAS	5
79	Signaling by NTRK2 (TRKB)	None	0	PIK3R1,BDNF,KRAS	3
80	Chromatin modifying enzymes	None	0	ACTB,TBL1XR1,KDM6B,PRMT1,NCOR1,HDAC3,GPS2	7
81	Downstream signal transduction	None	0	PIK3R1,STAT1,KRAS	3
82	Transmission across Chemical Synapses	None	0	ABAT,KPNA2,PRKCG,CACNA1E,PLCB1,GRIN1,KRAS	7
83	Opioid Signalling	None	0	KPNA2,PRKCG,PRKCD,PLCB1	4
84	CaM pathway	None	0	KPNA2,PRKCG,PRKCD	3
85	Calmodulin induced events	None	0	KPNA2,PRKCG,PRKCD	3
86	Activated NTRK2 signals through RAS	None	0	BDNF,KRAS	2
87	Regulation of lipid metabolism by Peroxisome proliferator-activated receptor alpha (PPARalpha)	None	0	TBL1XR1,SIN3A,NCOR1,HDAC3,GPS2	5
88	Estrogen-dependent gene expression	None	0	FOXA1,KPNA2,RUNX1,CBFB,STAG1,PRMT1	6
89	Activated NTRK2 signals through PI3K	None	0	PIK3R1,BDNF	2
90	MECP2 regulates transcription of neuronal ligands	None	0	BDNF,SIN3A	2
91	RHO GTPase Effectors	None	0	BUB1B,ACTB,PRKCD,	7
				AR,YWHAE,WAS,PKN2
